# Supplementary material for: Implication of Polyhistidine, a Novel Apoptosis Inhibitor, in Inhibiting Lipopolysaccharide-Induced Apoptosis in Boar Sperm
Source: PubMed Central journal article supplement (PMC6827019; doi:10.3390/ani9100719), 2019-09-24
Supplement: animals-09-00719-s001.pdf [file animals-09-00719-s001.pdf]

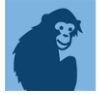

# Supplementary Materials: Implication of Polyhistidine, a Novel Apoptosis Inhibitor, in Inhibiting Lipopolysaccharide-Induced Apoptosis in Boar Sperm

Tianzeng Song<sup>1,2</sup>, Yi Shi<sup>1</sup>, Yangang Wang<sup>1</sup>, Izhar Hyder Qazi<sup>1,3</sup>, Christiana Angel<sup>4,5</sup>, Ming Zhang<sup>1,\*</sup>

<sup>1</sup> College of Animal Science & Technology, Sichuan Agricultural University, Chengdu 611130, China; songtianzeng@china.com.cn (S.T.); shiyi9005@163.com (Y. S.); idsuperwang@sina.com (Y. W.); vetdr\_izhar@yahoo.com (I.H.Q.); zhangming@sicau.edu.cn (M. Z.)

<sup>2</sup> Institute of Animal Science, Tibet Academy of Agricultural and Animal Husbandry Science, Lhasa 850009, China

<sup>3</sup> Department of Veterinary Anatomy & Histology, Shaheed Benazir Bhutto University of Veterinary and Animal Sciences, Sakrand 67210, Pakistan

<sup>4</sup> Department of Veterinary Parasitology, College of Veterinary Medicine, Sichuan Agricultural University, Chengdu 611130, China; qazi5502@yahoo.com

<sup>5</sup> Department of Veterinary Parasitology, Faculty of Veterinary Sciences, Shaheed Benazir Bhutto University of Veterinary and Animal Sciences, Sakrand 67210, Pakistan

\* Correspondence: zhangming@sicau.edu.cn

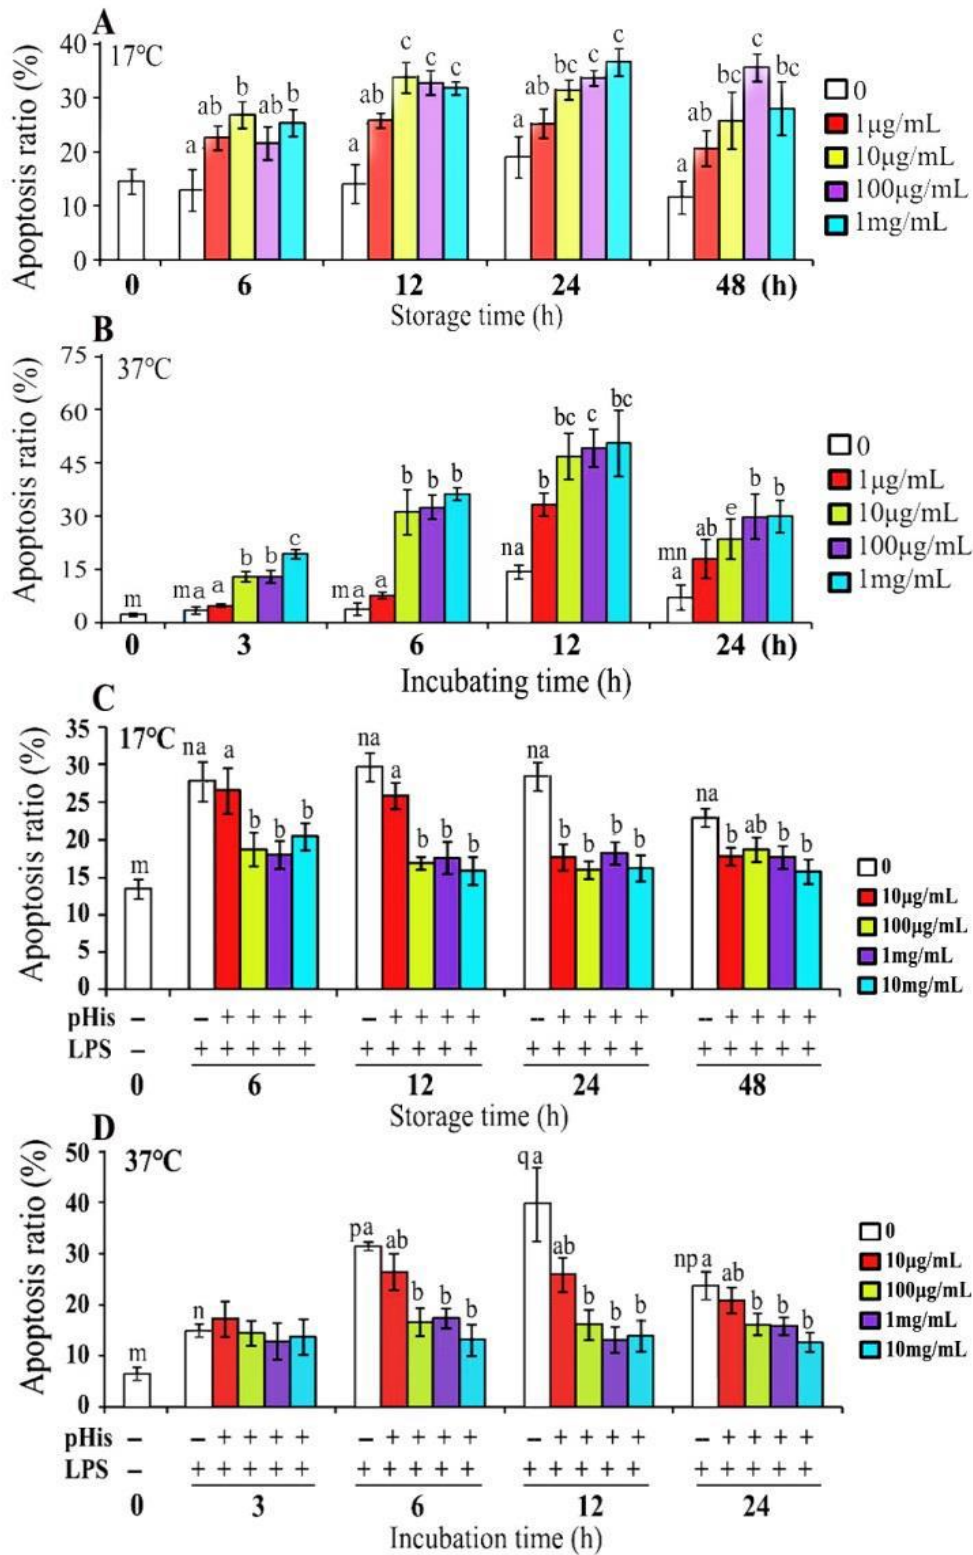

**Figure S1.** The preliminary experiment for determining the dosage Lipopolysaccharide (LPS) and Polyhistidine (pHis). A and C: Sperm apoptosis rate at 17 °C, B and D: Sperm apoptosis under 37 °C. In C and D, sperm was pre-incubated in different dosage of pHis for 30 min, and then added 10 µg/mL of LPS. a, b, c means the significant difference within the same time-point. m, n, p, q indicates the significant difference with time-course in 0 µg/mL of LPS (A and B) or 0 µg/mL of pHis (C and D). The results suggested that 10 µg/mL of LPS and 100 µg/mL of pHis is the appropriate dosage. 100 µg/mL of pHis and 10 µg/mL of LPS.
